# Supplementary material
Source: MDPI journal article supplement (https://www.mdpi.com/2813-2882/2/1/1)
Supplement: s1 [file s1]

## Supplementary Materials

**Table S1.** Rate of verbal bullying victimization on campus among students with different characteristics according to different areas. Age–sex adjusted rate ratios (RR)<sup>a</sup> comparing rural and urban students are also indicated.

| Variables                     | Urban Rate (95%CI)  |                                                                                     | Rural Rate (95%CI)  |                                                                                       | Adjusted RR (95%CI) <sup>b</sup> |
|-------------------------------|---------------------|-------------------------------------------------------------------------------------|---------------------|---------------------------------------------------------------------------------------|----------------------------------|
| Sex                           |                     |                                                                                     |                     |                                                                                       |                                  |
| Boys                          | 10.87 (7.51–15.72)  |    | 12.86 (11.10–14.89) |    | 1.10 (0.89–1.36)                 |
| Girls                         | 7.22 (4.74–11.01)   |    | 8.96 (7.78–10.32)   |    | 1.14 (0.87–1.48)                 |
| Age group (years)             |                     |                                                                                     |                     |                                                                                       |                                  |
| <15                           | 11.41 (7.90–16.46)  |    | 11.62 (8.17–16.53)  |    | 1.01 (1.00–1.03) *               |
| ≥15                           | 7.64 (5.03–11.60)   |    | 10.02 (7.10–14.16)  |    | 1.29 (1.21–1.38) ***             |
| Boarding                      |                     |                                                                                     |                     |                                                                                       |                                  |
| Yes                           | 8.48 (6.27–11.48)   |    | 12.58 (9.72–16.29)  |    | 1.32 (1.16–1.49) ***             |
| No                            | 9.49 (6.82–13.21)   |    | 10.32 (8.37–12.73)  |    | 1.02 (0.89–1.17)                 |
| Family structure              |                     |                                                                                     |                     |                                                                                       |                                  |
| Nuclear family                | 9.06 (6.52–12.57)   |    | 9.89 (7.67–12.76)   |    | 0.99 (0.85–1.14)                 |
| Non-nuclear family            | 9.13 (6.67–12.50)   |    | 11.87 (9.74–14.48)  |    | 1.21 (1.08–1.35) **              |
| Paternal education attainment |                     |                                                                                     |                     |                                                                                       |                                  |
| Primary school or below       | 10.64 (8.82–12.83)  |    | 12.50 (8.66–18.05)  |    | 1.13 (0.92–1.38)                 |
| Middle or high school         | 9.13 (6.41–13.01)   |    | 11.14 (8.78–14.13)  |    | 1.12 (0.95–1.32)                 |
| College or above              | 8.29 (6.54–10.51)   |    | 9.81 (7.93–12.15)   |    | 1.06 (0.88–1.28)                 |
| Maternal education attainment |                     |                                                                                     |                     |                                                                                       |                                  |
| Primary school or below       | 10.20 (7.18–14.48)  |    | 13.93 (10.88–17.84) |    | 1.30 (1.06–1.59) *               |
| Middle or high school         | 8.86 (6.44–12.19)   |    | 10.58 (8.33–13.44)  |    | 1.09 (0.95–1.25)                 |
| College or above              | 9.13 (6.75–12.35)   |  | 10.19 (7.72–13.44)  |  | 0.98 (0.79–1.21)                 |
|                               |                     | 0.0 20.0 40.0                                                                       |                     | 0.0 20.0 40.0                                                                         |                                  |
|                               |                     | Urban Rate (95%CI)                                                                  |                     | Rural Rate (95%CI)                                                                    |                                  |
| Depression                    |                     |                                                                                     |                     |                                                                                       |                                  |
| Yes                           | 14.83 (12.64–17.39) |  | 18.80 (15.65–22.58) |  | 1.21 (1.08–1.34) ***             |
| No                            | 7.76 (5.07–11.87)   |  | 9.25 (6.91–12.39)   |  | 1.06 (0.88–1.27)                 |
| Internet Addiction            |                     |                                                                                     |                     |                                                                                       |                                  |
| Yes                           | 15.55 (12.43–19.45) |  | 16.00 (13.16–19.45) |  | 0.96 (0.65–1.42)                 |
| No                            | 8.90 (6.40–12.36)   |  | 10.95 (8.75–13.70)  |  | 1.13 (1.00–1.27) *               |
| Overweight and Obesity        |                     |                                                                                     |                     |                                                                                       |                                  |
| Yes                           | 10.91 (9.02–13.20)  |  | 13.40 (12.15–14.77) |  | 1.15 (1.01–1.30) *               |
| No                            | 8.23 (5.51–12.29)   |  | 9.98 (7.57–13.16)   |  | 1.09 (0.94–1.27)                 |
| Total                         | 9.10 (6.60–12.53)   |  | 11.06 (8.90–13.74)  |  | 1.11 (0.99–1.26)                 |
|                               |                     | 0.0 20.0 40.0                                                                       |                     | 0.0 20.0 40.0                                                                         |                                  |
|                               |                     | Urban Rate (95%CI)                                                                  |                     | Rural Rate (95%CI)                                                                    |                                  |

<sup>a</sup> RR is the ratio of the rates in rural versus urban students after adjusting for age and sex. <sup>b</sup> \*  $p < 0.05$ ,

\*\*  $p < 0.01$ , \*\*\*  $p < 0.001$ .

**Table S2.** Rate ratios (RR) and rural–urban disparities (RUD in terms of RR) for verbal bullying victimization and among students in Jiangsu according to area, internet addiction and depression.

| Category                                        | RR (95%CI) <sup>a b</sup> | RUD (95%CI) <sup>b</sup> |
|-------------------------------------------------|---------------------------|--------------------------|
| Urban + non-internet addiction + non-depression | 1.00                      |                          |
| Rural + non-internet addiction + non-depression | 1.09 (0.95–1.26)          | 1.09 (0.95–1.26)         |
| Urban + non-internet addiction + depression     | <b>1.99 (1.69–2.35)</b>   |                          |
| Rural +non-internet addiction + depression      | <b>2.35 (1.96–2.81)</b>   | 1.18 (0.96–1.45)         |
| Urban + internet addiction + non-depression     | <b>1.78 (1.11–2.87)</b>   |                          |
| Rural + internet addiction + non-depression     | 1.33 (0.59–2.96)          | 0.74 (0.29–1.88)         |
| Urban + internet addiction + depression         | <b>2.34 (1.49–3.68)</b>   |                          |
| Rural + internet addiction + depression         | <b>2.20 (1.18–4.11)</b>   | 0.94 (0.44–2.01)         |

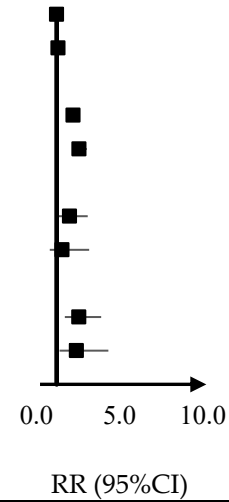

<sup>a</sup> RR is the ratio of the rates in rural versus urban students after adjusting for age and sex. <sup>b</sup> Rate ratios of statistical significance were in bold.
